# Supplementary material for: Whole Transcriptome Analyses of Apricots and Japanese Plum Fruits after 1-MCP (Ethylene-Inhibitor) and Ethrel (Ethylene-Precursor) Treatments Reveal New Insights into the Physiology of the Ripening Process
Source: MDPI journal article supplement (doi:10.3390/ijms231911045), 2022-09-20
Supplement: s1 [file s1]

Table S1. Raw data stats for apricot ‘Goldrich’ (GD) and Japanese plum ‘Santa Rosa’ (SNR) including a control (T0) and two treatments (1-MCP, T1 and ethrel, T2) as well as three replicates per treatment (A, B and C).

| Sample ID | Total read bases | Total reads | GC (%) | Q20   | Q30   |
|-----------|------------------|-------------|--------|-------|-------|
| GD-T0-A   | 9,408,660,812    | 62,309,012  | 46.1   | 96.93 | 91.78 |
| GD-T0-B   | 9,566,073,480    | 63,351,480  | 45.96  | 97.17 | 92.21 |
| GD-T0-C   | 8,931,888,580    | 59,151,580  | 46.22  | 97.13 | 92.09 |
| GD-T1-A   | 9,242,216,834    | 61,206,734  | 45.95  | 97.15 | 92.17 |
| GD-T1-B   | 8,645,798,846    | 57,256,946  | 46.66  | 97.07 | 92.23 |
| GD-T1-C   | 8,616,004,734    | 57,059,634  | 45.90  | 96.81 | 91.42 |
| GD-T2-A   | 9,749,954,636    | 64,569,236  | 45.47  | 97.10 | 92.03 |
| GD-T2-B   | 9,082,979,784    | 60,152,184  | 45.99  | 97.00 | 91.92 |
| GD-T2-C   | 7,225,079,408    | 47,848,208  | 45.88  | 96.84 | 91.48 |
| SNR-T0-A  | 7,150,458,832    | 47,354,032  | 46.39  | 96.95 | 91.72 |
| SNR-T0-B  | 7,169,963,502    | 47,483,202  | 45.89  | 96.93 | 91.68 |
| SNR-T0-C  | 8,521,170,996    | 56,431,596  | 45.81  | 97.11 | 92.04 |
| SNR-T1-A  | 7,343,752,120    | 48,634,120  | 46.19  | 96.63 | 91.11 |
| SNR-T1-B  | 7,903,112,292    | 52,338,492  | 46.72  | 96.63 | 91.07 |
| SNR-T1-C  | 8,869,491,454    | 58,738,354  | 46.27  | 96.76 | 91.31 |
| SNR-T2-A  | 9,702,466,646    | 64,254,746  | 46.4   | 97.41 | 92.71 |
| SNR-T2-B  | 10,276,368,420   | 68,055,420  | 46.18  | 97.23 | 92.27 |
| SNR-T2-C  | 9,344,111,332    | 61,881,532  | 46.27  | 97.24 | 92.31 |

Total read bases: Total number of bases sequenced

Total reads: Total number of reads

GC (%): GC content

Q20 (%): Ratio of bases that have phred quality score greater than or equal to 20

Q30 (%): Ratio of bases that have phred quality score greater than or equal to 30

Table S2. Trimming data stats for apricot ‘Goldrich’ (GD) and Japanese plum ‘Santa Rosa’ (SNR) including a control (T0) and two treatments (1-MCP, T1 and ethrel, T2) as well as three replicates per treatment (A, B and C).

| Sample ID | Total read bases | Total reads | GC(%) | Q20   | Q30   |
|-----------|------------------|-------------|-------|-------|-------|
| GD-T0-A   | 8,876,484,974    | 61,004,076  | 45.99 | 97.79 | 93.05 |
| GD-T0-B   | 9,127,950,897    | 62,288,240  | 45.91 | 97.89 | 93.28 |
| GD-T0-C   | 8,509,019,717    | 58,134,278  | 46.13 | 97.84 | 93.15 |
| GD-T1-A   | 8,822,723,860    | 60,124,492  | 45.90 | 97.87 | 93.24 |
| GD-T1-B   | 8,026,138,929    | 56,114,096  | 46.47 | 98.03 | 93.62 |
| GD-T1-C   | 8,217,861,834    | 55,994,724  | 45.84 | 97.59 | 92.56 |
| GD-T2-A   | 9,339,043,173    | 63,428,126  | 45.42 | 97.81 | 93.07 |
| GD-T2-B   | 8,669,361,723    | 58,926,992  | 45.95 | 97.81 | 93.09 |
| GD-T2-C   | 6,893,666,152    | 46,924,412  | 45.83 | 97.60 | 92.61 |
| SNR-T0-A  | 6,826,470,226    | 46,483,942  | 46.35 | 97.69 | 92.82 |
| SNR-T0-B  | 6,848,033,928    | 46,593,278  | 45.84 | 97.69 | 92.80 |
| SNR-T0-C  | 8,148,738,444    | 55,446,922  | 45.73 | 97.82 | 93.10 |
| SNR-T1-A  | 6,953,085,901    | 47,617,922  | 46.12 | 97.52 | 92.43 |
| SNR-T1-B  | 7,520,750,017    | 51,243,158  | 46.69 | 97.49 | 92.32 |
| SNR-T1-C  | 8,444,387,459    | 57,553,810  | 46.24 | 97.56 | 92.48 |
| SNR-T2-A  | 9,249,882,757    | 63,360,424  | 46.30 | 98.04 | 93.65 |
| SNR-T2-B  | 9,852,936,763    | 67,065,126  | 46.11 | 97.87 | 93.21 |
| SNR-T2-C  | 8,941,129,524    | 60,984,118  | 46.18 | 97.87 | 93.24 |

Total read bases: Total number of bases sequenced

Total reads: Total number of reads

GC (%): GC content

Q20 (%): Ratio of bases that have phred quality score greater than or equal to 20

Q30 (%): Ratio of bases that have phred quality score greater than or equal to 30

Table S3. *De novo* Transcriptome assembly statistics for apricot ‘Goldrich’

| Assembly                  | All transcript contigs | Only longest isoform per 'gene' |
|---------------------------|------------------------|---------------------------------|
| Total trinity 'genes'     | 81,894                 | 81,894                          |
| Total trinity transcripts | 102,718                | 81,894                          |
| GC (%)                    | 41.47                  | 41.45                           |
| N90                       | 308                    | 280                             |
| N80                       | 477                    | 406                             |
| N70                       | 710                    | 591                             |
| N60                       | 1,003                  | 855                             |
| N50                       | 1,336                  | 1,204                           |
| N40                       | 1,680                  | 1,589                           |
| N30                       | 2,057                  | 1,994                           |
| N20                       | 2,529                  | 2,487                           |
| N10                       | 3,298                  | 3,274                           |
| Maximum contig length     | 13,689                 | 13,689                          |
| Minimum contig length     | 201                    | 201                             |
| Median contig length      | 447,0                  | 393.0                           |
| Average contig length     | 788,60                 | 715,20                          |
| Total assembled bases     | 81,003,397             | 58,570,553                      |

-Total trinity genes: Total number of assembled genes by Trinity

-Total trinity transcripts: Total number of assembled transcripts by Trinity

-Percent GC: GC percent

-N[x] length statistic: at least x% of the assembled transcript nucleotides are found in contigs that are at least of Nx length. The traditional method is computing N50, such that at least half of all assembled bases are in transcript contigs of at least the N50 length value. The contig N50 values can often be exaggerated due to an assembly program generating too many transcript isoforms, especially for the longer transcripts. To mitigate this effect, Nx values are also calculated based on the longest isoform per gene.

-Maximum/Minimum/Median/Average contig length: Maximum/Minimum/Median/Averaged length of assembled transcripts

-Total assembled bases: The left column is total bases of assembled contigs and right column is total bases of the longest isoform.

Table S4. *De novo* Transcriptome assembly statistics for Japanese plum ‘Santa Rosa’

| Assembly                  | ALL transcript contigs | Only longest isoform per 'gene' |
|---------------------------|------------------------|---------------------------------|
| Total trinity 'genes'     | 74,999                 | 74,999                          |
| Total trinity transcripts | 96,864                 | 74,999                          |
| GC (%)                    | 41,39                  | 41,37                           |
| N90                       | 317                    | 291                             |
| N80                       | 481                    | 416                             |
| N70                       | 712                    | 600                             |
| N60                       | 1,015                  | 885                             |
| N50                       | 1,348                  | 1,256                           |
| N40                       | 1,694                  | 1,641                           |
| N30                       | 2,054                  | 2,033                           |
| N20                       | 2,504                  | 2,494                           |
| N10                       | 3,279                  | 3,269                           |
| Maximum contig length     | 14,450                 | 14,450                          |
| Minimum contig length     | 201                    | 201                             |
| Median contig length      | 456                    | 404                             |
| Average contig length     | 798.77                 | 732.73                          |
| Total assembled bases     | 77,371,727             | 54,953,688                      |

-Total trinity genes: Total number of assembled genes by Trinity

-Total trinity transcripts: Total number of assembled transcripts by Trinity

-Percent GC: GC percent

-N[x] length statistic: at least x% of the assembled transcript nucleotides are found in contigs that are at least of Nx length. The traditional method is computing N50, such that at least half of all assembled bases are in transcript contigs of at least the N50 length value. The contig N50 values can often be exaggerated due to an assembly program generating too many transcript isoforms, especially for the longer transcripts. To mitigate this effect, Nx values are also calculated based on the longest isoform per gene.

-Maximum/Minimum/Median/Average contig length: Maximum/Minimum/Median/Averaged length of assembled transcripts

-Total assembled bases: The left column is total bases of assembled contigs and right column is total bases of the longest iso
